# Supplementary material for: Effectiveness of Monovalent Rotavirus Vaccine in Mozambique, a Country with a High Burden of Chronic Malnutrition
Source: MDPI journal article supplement (doi:10.3390/vaccines10030449), 2022-03-15
Supplement: s1 [file s1]

**Supplementary Table S2.** Distribution of stunted children by sentinel sites (2017-2019).

| Site name                        | Stunting   |                  | Total (%)  |
|----------------------------------|------------|------------------|------------|
|                                  | No (%)     | Yes (%)          |            |
| Centro De Saúde Da Manhiça       | 75 (23.9)  | <b>30 (16.3)</b> | 105 (21.1) |
| Hospital Central Da Beira        | 18 (5.7)   | 8 (4.3)          | 26 (5.2)   |
| Hospital Central De Maputo       | 20 (6.4)   | 4 (2.2)          | 24 (4.8)   |
| Hospital Central De Nampula      | 54 (17.2)  | <b>89 (48.4)</b> | 143 (28.7) |
| Hospital Gera Jose Macamo        | 37 (11.8)  | 14 (7.6)         | 51 (10.2)  |
| Hospital Geral De Mavalane       | 106 (33.8) | <b>35 (19.0)</b> | 141 (28.3) |
| Hospital Provincial De Quelimane | 4 (1.3)    | 4 (2.2)          | 8 (1.6)    |
| <b>Total</b>                     | <b>314</b> | <b>184</b>       | <b>498</b> |
