# Supplementary material for: Effectiveness of Monovalent Rotavirus Vaccine in Mozambique, a Country with a High Burden of Chronic Malnutrition
Source: MDPI journal article supplement (doi:10.3390/vaccines10030449), 2022-03-15
Supplement: s1 [file s1]

**Supplementary Table S1:** Modified 20-point clinical modified Vesikari score.

| Symptom or Sign                    | Vesikari 20 points scale | Mozambique Modification | Notes                                                   |
|------------------------------------|--------------------------|-------------------------|---------------------------------------------------------|
| <b><i>Duration of diarrhea</i></b> |                          |                         |                                                         |
| 1 - 4 days                         | 1                        | 1                       | <i>24 hours prior the interview</i>                     |
| 5 days                             | 2                        | 2                       |                                                         |
| ≥ 6 days                           | 3                        | 3                       |                                                         |
| <b><i>Max stools/24h</i></b>       |                          |                         |                                                         |
| 1-3                                | 1                        | 1                       | <i>24 hours prior the interview</i>                     |
| 4-5                                | 2                        | 2                       |                                                         |
| ≥ 6                                | 3                        | 3                       |                                                         |
| <b><i>Duration of vomiting</i></b> |                          |                         |                                                         |
| 1 day                              | 1                        | 1                       | <i>24 hours prior the interview</i>                     |
| 2 days                             | 2                        | 2                       |                                                         |
| ≥ 3 days                           | 3                        | 3                       |                                                         |
| <b><i>Max vomiting / 24h</i></b>   |                          |                         |                                                         |
| 0                                  | 0                        | 0                       | <i>24 hours prior the interview</i>                     |
| 1                                  | 1                        | 1                       |                                                         |
| 2 - 4                              | 2                        | 2                       |                                                         |
| ≥5                                 | 3                        | 3                       |                                                         |
| <b><i>Fever (° Celsius)</i></b>    |                          |                         |                                                         |
| < 37.0                             | 0                        | 0                       | <i>24 hours prior the interview</i>                     |
| 37.1 - 38.4                        | 1                        | 1                       |                                                         |
| 38.5 - 38.9                        | 2                        | 2                       |                                                         |
| ≥ 39                               | 3                        | 3                       |                                                         |
| <b><i>Dehydration</i></b>          |                          |                         |                                                         |
| None                               | 0                        | 0                       | <i>None</i>                                             |
| 1 - 5%                             | 2                        | 2                       | <i>Mild / Moderate</i>                                  |
| ≥ 6%                               | 3                        | 3                       | <i>Severe</i>                                           |
| <b><i>Treatment</i></b>            |                          |                         |                                                         |
| None                               | 0                        | 0                       | <i>IV Rehydration<br/>All children are hospitalized</i> |
| Rehydration                        | 1                        | 2                       |                                                         |
| Hospitalization                    | 2                        | *NA                     |                                                         |

NA: Non Applicable

Tarja Ruuska & Timo Vesikari (1990) Rotavirus Disease in Finnish Children: Use of Numerical Scores for Clinical Severity of Diarrhoeal Episodes, *Scandinavian Journal of Infectious Diseases*, 22:3, 259-267, DOI: 10.3109/00365549009027046
