# Supplementary material for: Effectiveness of Monovalent Rotavirus Vaccine in Mozambique, a Country with a High Burden of Chronic Malnutrition
Source: MDPI journal article supplement (doi:10.3390/vaccines10030449), 2022-03-15
Supplement: s1 [file s1]

**Supplementary Table S3.** Vaccine effectiveness estimates by different characteristics of the children in fully vaccinated vs unvaccinated & Partially vaccinated vs unvaccinated children 2017-2019.

| Model                                       | Controls<br>(vaccinated/total) | Cases<br>(vaccinated/total) | Crude |            |         | Adjusted* |            |         |
|---------------------------------------------|--------------------------------|-----------------------------|-------|------------|---------|-----------|------------|---------|
|                                             |                                |                             | VE    | 95% CI     | P-value | VE        | 95% CI     | P-value |
| Overall                                     |                                |                             |       |            |         |           |            |         |
| Partially vaccinated                        | 44/526 (8.4%)                  | 13/163 (8%)                 | 20    | (-92, 67)  | 0.62    | 35        | (-60, 74)  | 0.35    |
| Fully vaccinated                            | 444/526 (84.4%)                | 136/163 (83.4%)             | 17    | (-63, 55)  | 0.57    | 35        | (-31, 66)  | 0.21    |
| 6 to 8-month-olds only                      |                                |                             |       |            |         |           |            |         |
| Partially vaccinated                        | 8/114 (7%)                     | 5/42 (11.9%)                | 13    | (-343, 83) | 0.87    | 15        | (-390, 85) | 0.85    |
| Fully vaccinated                            | 99/114 (86.8%)                 | 32/42 (76.2%)               | 55    | (-62, 87)  | 0.20    | 60        | (-54, 89)  | 0.17    |
| 9 to 11-month-olds only                     |                                |                             |       |            |         |           |            |         |
| Partially vaccinated                        | 15/153 (9.8%)                  | 4/53 (7.5%)                 | 47    | (-130, 89) | 0.40    | 52        | (-121, 90) | 0.35    |
| Fully vaccinated                            | 126/153 (82.4%)                | 43/53 (81.1%)               | 32    | (-106, 75) | 0.47    | 45        | (-73, 81)  | 0.28    |
| 6 to 11 month-olds only                     |                                |                             |       |            |         |           |            |         |
| Partially vaccinated                        | 23/267 (8.6%)                  | 9/95 (9.5%)                 | 32    | (-97, 77)  | 0.47    | 40        | (-83, 81)  | 0.37    |
| Fully vaccinated                            | 225/267 (84.3%)                | 75/95 (78.9%)               | 42    | (-30, 73)  | 0.17    | 54        | (-9, 80)   | 0.07    |
| 12 to 23-month-olds only                    |                                |                             |       |            |         |           |            |         |
| Partially vaccinated                        | 19/212 (9%)                    | 3/60 (5%)                   | 11    | (-441, 85) | 0.90    | 31        | (-331, 89) | 0.68    |
| Fully vaccinated                            | 176/212 (83%)                  | 54/60 (90%)                 | -74   | (-665, 44) | 0.39    | -33       | (-498, 59) | 0.67    |
| Severe: Modified Vesikari Score $\geq 11$   |                                |                             |       |            |         |           |            |         |
| Partially vaccinated                        | 11/81 (13.6%)                  | 8/58 (13.8%)                | 17    | (-228, 79) | 0.79    | 56        | (-101, 91) | 0.30    |
| Fully vaccinated                            | 62/81 (76.5%)                  | 43/58 (74.1%)               | 21    | (-142, 73) | 0.68    | 54        | (-61, 87)  | 0.22    |
| Less severe: Modified Vesikari Score $< 11$ |                                |                             |       |            |         |           |            |         |
| Partially vaccinated                        | 10/78 (12.8%)                  | 2/28 (7.1%)                 | 40    | (-344, 93) | 0.62    | 32        | (-424, 93) | 0.71    |
| Fully vaccinated                            | 59/78 (75.6%)                  | 23/28 (82.1%)               | -17   | (-462, 68) | 0.83    | -34       | (-604, 69) | 0.70    |
| Stunted (HAZ $< -2$ )                       |                                |                             |       |            |         |           |            |         |
| Partially vaccinated                        | 13/133 (9.8%)                  | 3/43 (7%)                   | 37    | (-172, 88) | 0.55    | 37        | (-175, 88) | 0.55    |
| Fully vaccinated                            | 101/133 (75.9%)                | 33/43 (76.7%)               | 11    | (-144, 65) | 0.80    | 10        | (-151, 65) | 0.83    |

|                             |                 |                 |    |            |      |    |            |      |
|-----------------------------|-----------------|-----------------|----|------------|------|----|------------|------|
| Not Stunted (HAZ $\geq$ -2) |                 |                 |    |            |      |    |            |      |
| Partially vaccinated        | 20/234 (8.5%)   | 8/75 (10.7%)    | -7 | (-480, 76) | 0.94 | 49 | (-222, 91) | 0.45 |
| Fully vaccinated            | 206/234 (88%)   | 64/75 (85.3%)   | 17 | (-287, 77) | 0.79 | 60 | (-120, 91) | 0.26 |
| G1P[8] Rotavirus            |                 |                 |    |            |      |    |            |      |
| Partially vaccinated        | 44/526 (8.4%)   | 1/23 (4.3%)     | 57 | (-368, 98) | 0.50 | 62 | (-324, 98) | 0.44 |
| Fully vaccinated            | 444/526 (84.4%) | 20/23 (87%)     | 14 | (-449, 76) | 0.84 | 27 | (-376, 81) | 0.68 |
| Non-G1P[8] Rotavirus        |                 |                 |    |            |      |    |            |      |
| Partially vaccinated        | 44/526 (8.4%)   | 12/140 (8.6%)   | 14 | (-116, 66) | 0.75 | 29 | (-81, 72)  | 0.47 |
| Fully vaccinated            | 444/526 (84.4%) | 116/140 (82.9%) | 17 | (-70, 57)  | 0.59 | 36 | (-35, 67)  | 0.22 |

Unconditional logistic regression. \*Adjusted for age, rural location of hospital, and season of admission (Jan-June vs. July- Dec).
