# Supplementary figures and images for: Effectiveness of Monovalent Rotavirus Vaccine in Mozambique, a Country with a High Burden of Chronic Malnutrition
Source: MDPI journal article supplement (doi:10.3390/vaccines10030449), 2022-03-15

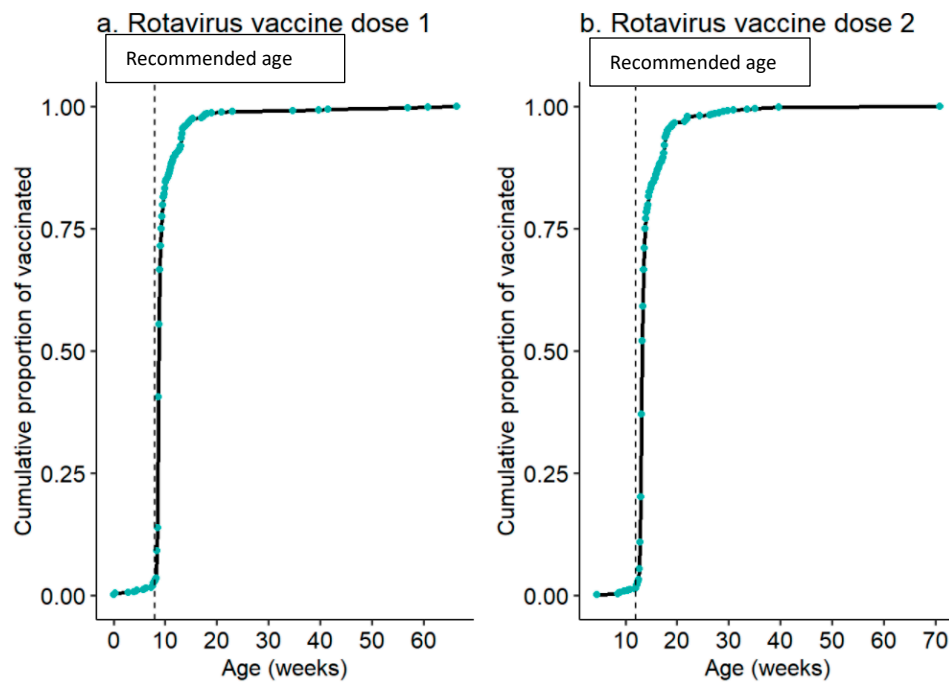

**Supplementary Figure S1.** Cumulative percentage of vaccinated children by age (in weeks).

Supplement: s1 [file s1]
